# Supplementary material for: Shear-aligned tunicate-cellulose-nanocrystal-reinforced hydrogels with mechano-thermo-chromic properties
Source: Royal Society of Chemistry journal article supplement (doi:10.1039/d1tc00911g), 2021-01-01
Supplement: d1tc00911g4.pdf [file d1tc00911g4.pdf]

## Supporting Information

### **Shear-Aligned Tunicate Cellulose Nanocrystals Reinforced Hydrogels with Mechano-Thermo-Chromic Properties**

*Junmei Wang,<sup>‡a</sup> Qiaoyun Cheng,<sup>‡a, b</sup> Shengyao Feng,<sup>c</sup> Lina Zhang,<sup>\*a</sup> and Chunyu Chang<sup>\*a</sup>*

<sup>a</sup> College of Chemistry and Molecular Sciences, Hubei Engineering Center of Natural Polymer-based Medical Materials, Wuhan University, Wuhan 430072, China

<sup>b</sup> Research Center for Sugarcane Industry Engineering Technology of Light Industry Institute of Bioengineering, Guangdong Academy of Science, Guangzhou 510316, China

<sup>c</sup> National Synchrotron Radiation Lab and College of Nuclear Science and Technology, University of Science and Technology of China, Hefei 230026, China

<sup>‡</sup> Authors contributed equally to this work.

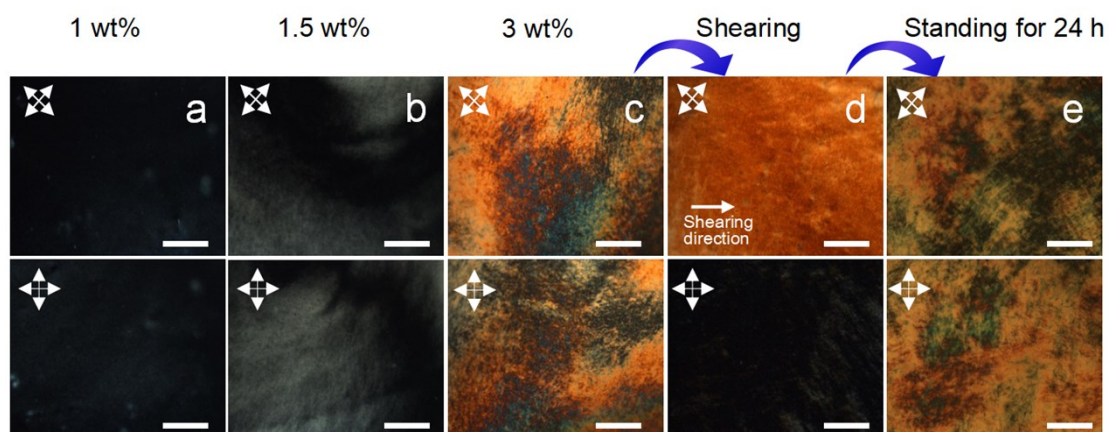

**Figure S1.** Polarized optical microscope (POM) images of TCNC aqueous suspensions with various concentration observed by placing samples with angles of  $45^\circ$  and  $0/90^\circ$ , respectively, the bar is  $500\ \mu\text{m}$ . (a) 1 wt%, (b) 1.5 wt%, (c) 3 wt%, (d) TCNC suspension (3 wt%) after shearing, and (e) the shear-oriented TCNC suspension stored for 24 h.

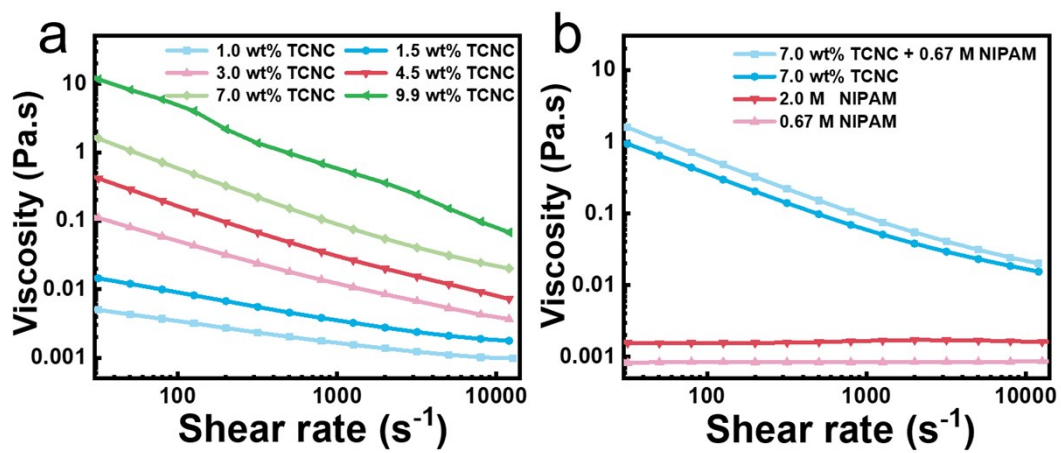

**Figure S2.** Viscosity of TCNC suspensions with different concentration as a function of shear rate (a), and viscosity of TCNC suspension (7 wt%), TCNC/0.67 M NIPAM mixture, and NIPAM solutions as a function of shear rate (b) at 25 °C.

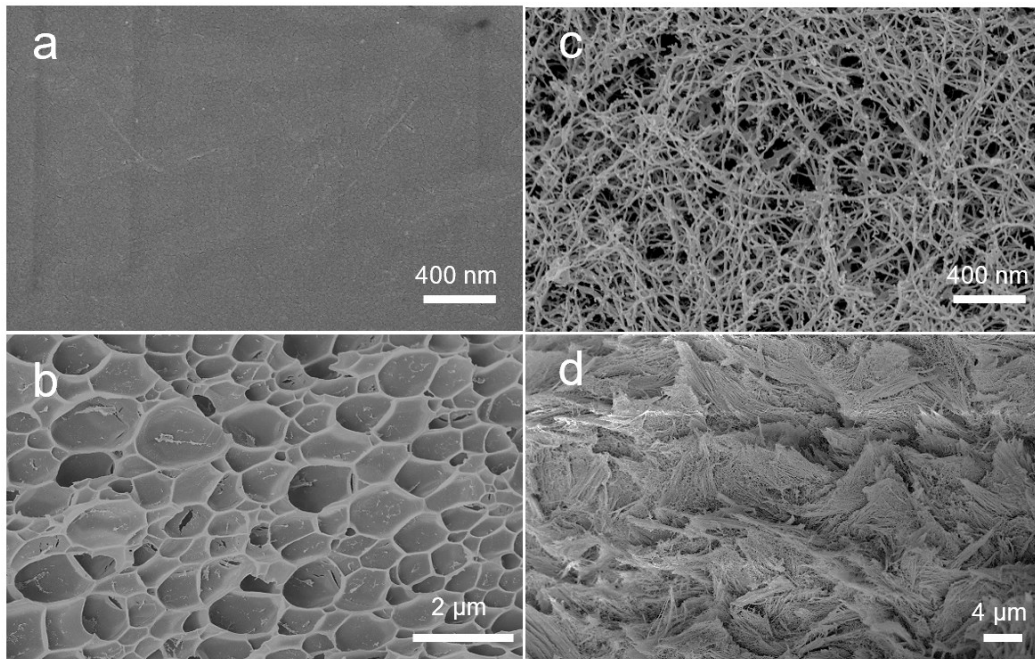

**Figure S3.** SEM images of surface (a, c) and cross-section (b, d) of PNIPAM hydrogel (a, b) and random TCNC/PNIPAM hydrogel (c, d).

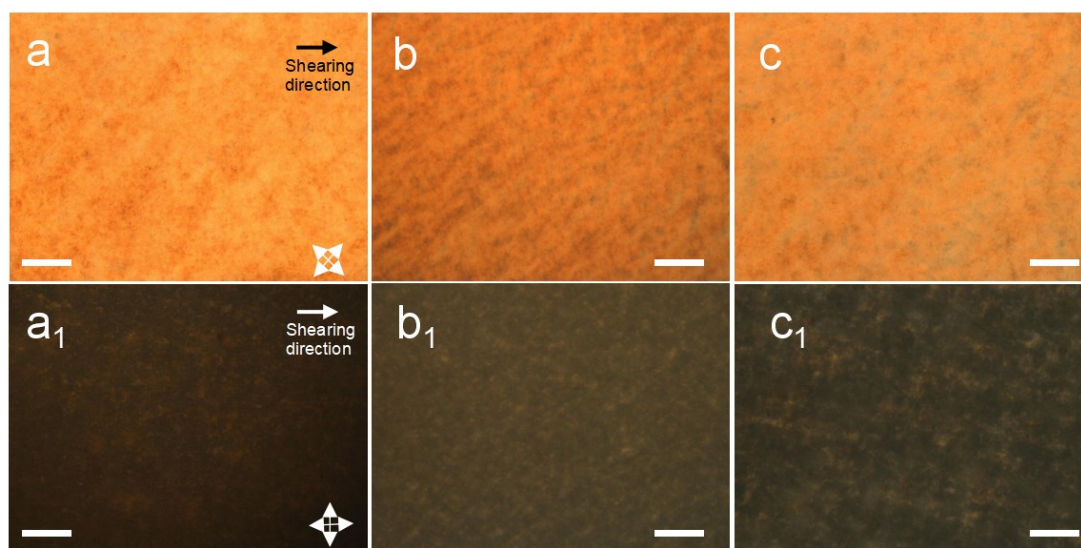

**Figure S4.** POM images of 7 wt% TCNC/0.67 M NIPAM mixture after shearing (a, a<sub>1</sub>), hydrogel (b, b<sub>1</sub>) and swollen hydrogel (c, c<sub>1</sub>). The shear direction oriented at 45° and 0/90° with respect to the polarization axis of either polarizers. The bar is 500 μm.

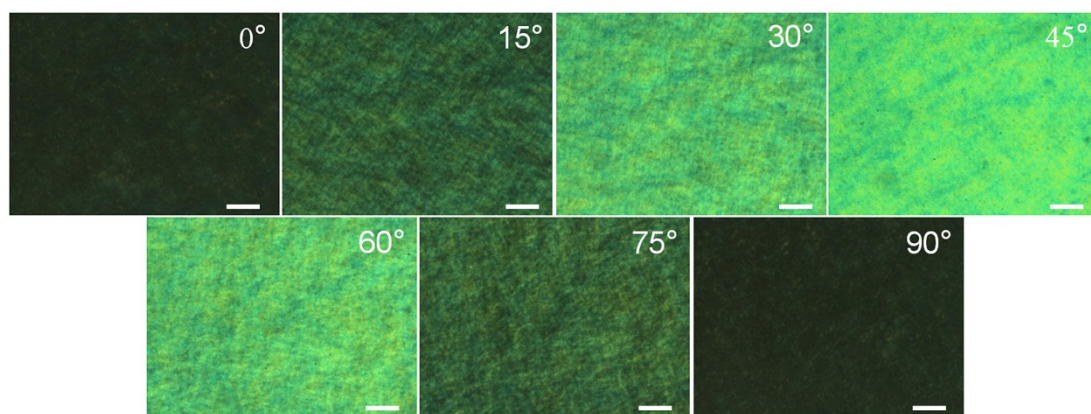

**Figure S5.** Transmission images of **OH-9** at different angle. The scale bar is 150  $\mu\text{m}$ .

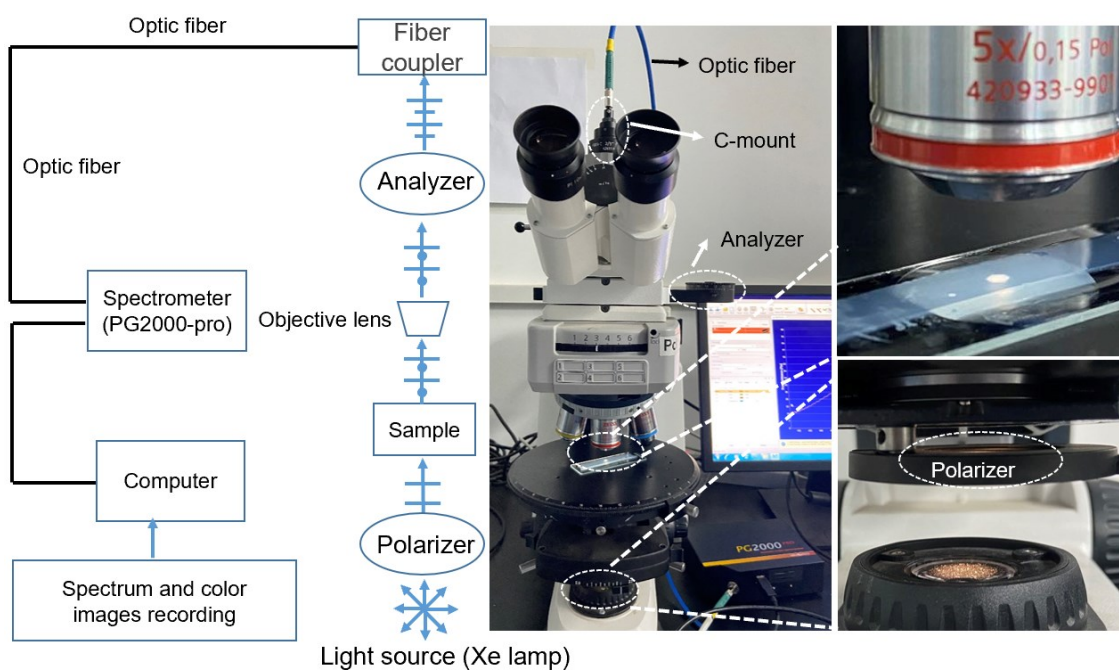

**Figure S6.** Schematic diagram of the optical device consisted of an optical fiber spectrometer and a polarizing optical microscope for recording spectra of TCNC nanocomposite hydrogels.

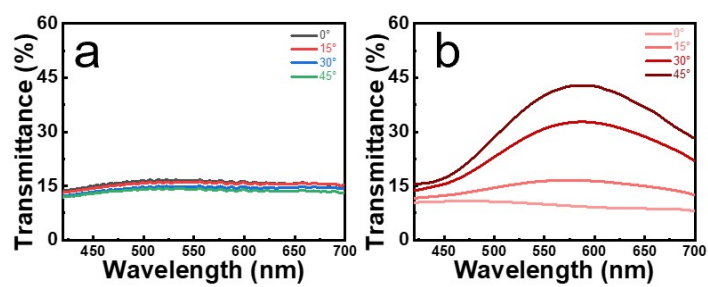

**Figure S7.** Transmission spectra of **RH** (a) and **OH-9** (b) measured by using the optical device (Figure S6) at different angles.



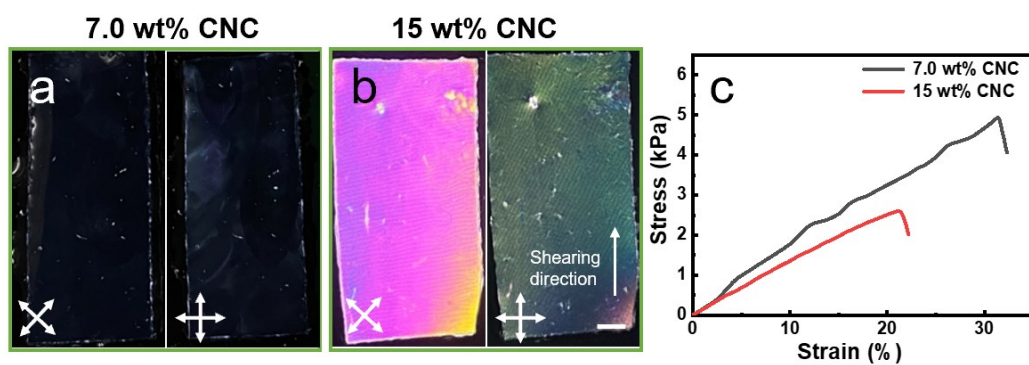

**Figure S8.** Photographs and tensile stress-strain curves (c) of plant-based CNC/PNIPAM hydrogel with 7 (a), 15 wt% (b) CNC. Scale bar = 2.5 mm.

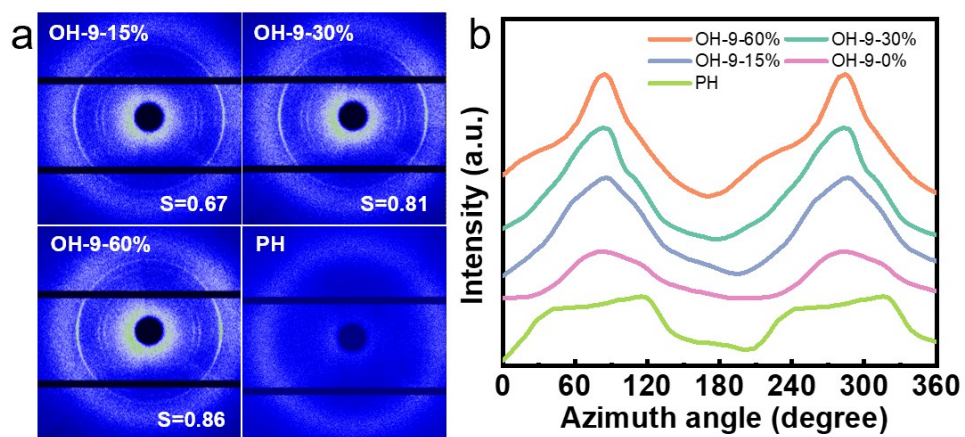

**Figure S9.** 2D WAXS patterns of **OH-9** with different strain (15, 30, and 60%) and **PH** (a); Azimuthal-integrated intensity distribution curves, where  $0^\circ$  represents the perpendicular direction (b).

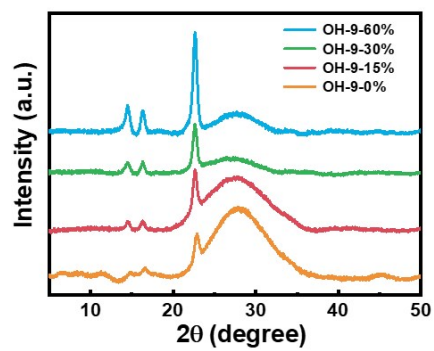

**Figure S10.** XRD patterns of **OH-9** at different strain.

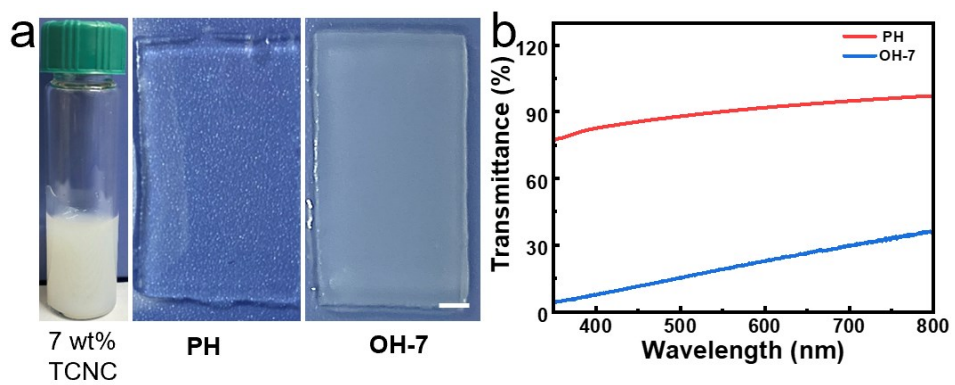

**Figure S11.** Photograph (a) and transmission spectra (b) of 7 wt% TCNC, **PH**, and **OH-7**.
